# Supplementary material for: The structure of innate vocalizations in Foxp2-deficient mouse pups
Source: PubMed Central journal article supplement (PMC2895353; doi:10.1111/j.1601-183x.2010.00570.x), 2010-06
Supplement: gbb0009-0390-SD2.pdf [file gbb0009-0390-SD2.pdf]

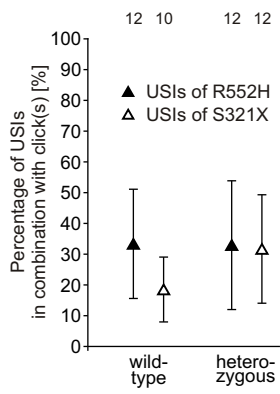

**Figure S2: Percentage of ultrasounds in combination with clicks emitted in isolation (USIs) by R552H and S321X pups.**

Except for wild-type S321X animals with a low percentage of USIs associated with clicks, about 1/3 of the USIs from the other groups contained clicks.
