# Supplementary material for: The structure of innate vocalizations in Foxp2-deficient mouse pups
Source: PubMed Central journal article supplement (PMC2895353; doi:10.1111/j.1601-183x.2010.00570.x), 2010-06
Supplement: gbb0009-0390-SD4.pdf [file gbb0009-0390-SD4.pdf]

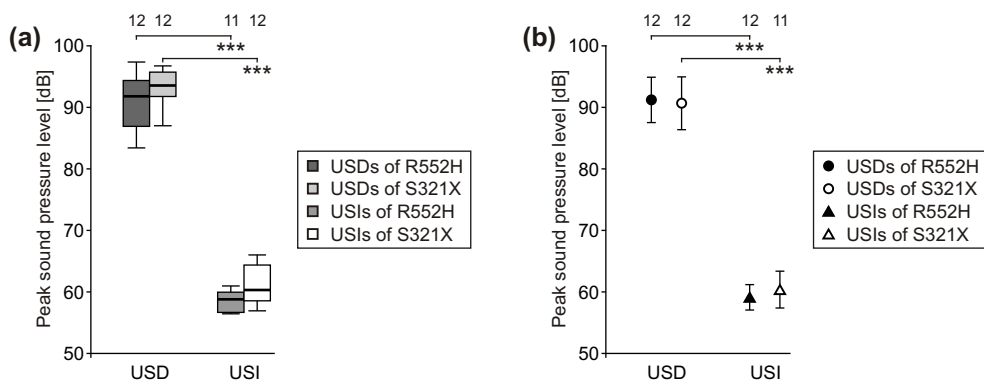

**Figure S4: Peak sound pressure level of ultrasounds emitted in distress (USDs) or in isolation (USIs).**

USDs were louder than USIs for all genotypes. (a) Wild-type animals, (b) heterozygotes.
