# Supplementary material for: The structure of innate vocalizations in Foxp2-deficient mouse pups
Source: PubMed Central journal article supplement (PMC2895353; doi:10.1111/j.1601-183x.2010.00570.x), 2010-06
Supplement: gbb0009-0390-SD5.pdf [file gbb0009-0390-SD5.pdf]

| Number of figure | mouse line | object of comparison | t-test  |    |         | one-way ANOVA |           |             | Tukey-test<br>p-value | one-way ANOVA on ranks      |                                      |        | U-test  |                    | Chi <sup>2</sup> -test |                        |                         | Spearman Correlation |         |                         |
|------------------|------------|----------------------|---------|----|---------|---------------|-----------|-------------|-----------------------|-----------------------------|--------------------------------------|--------|---------|--------------------|------------------------|------------------------|-------------------------|----------------------|---------|-------------------------|
|                  |            |                      | t-value | df | p-value | F-value       | df effect | df residual |                       | p-value                     | value of Kruskal-Wallis H            | df     | p-value | value of Whitney U | Mann-Whitney U         | p-value                | Chi <sup>2</sup> -value | df                   | p-value | correlation coefficient |
| 7a               | R552H      | DCs                  |         |    |         | 1.759         | 35        | 33          | 0.188                 |                             |                                      |        |         |                    |                        |                        |                         |                      |         |                         |
| 7a               | R552H      | USDs                 |         |    |         | 5.228         | 31        | 29          | 0.012                 | 0.013<br>0.030              | wt vs hom<br>het vs hom              |        |         |                    |                        |                        |                         |                      |         |                         |
| 7b               | S321X      | DCs                  |         |    |         | 5.561         | 35        | 33          | 0.008                 | 0.008                       | het vs hom                           |        |         |                    |                        |                        |                         |                      |         |                         |
| 7b               | S321X      | USDs                 |         |    |         | 23.756        | 34        | 32          | < 0.001               | < 0.001<br>< 0.001          | wt vs hom<br>het vs hom              |        |         |                    |                        |                        |                         |                      |         |                         |
| 7c               | R552H      |                      | 1.779   | 21 | 0.090   |               |           |             |                       |                             |                                      |        |         |                    |                        |                        |                         |                      |         |                         |
| 7c               | S321X      |                      | -0.674  | 20 | 0.508   |               |           |             |                       |                             |                                      |        |         |                    |                        |                        |                         |                      |         |                         |
| 8a               | R552H      |                      |         |    |         |               |           |             |                       |                             |                                      | 5.695  | 2       | 0.058              |                        |                        |                         |                      |         |                         |
| 8b               | S321X      |                      |         |    |         | 0.973         | 35        | 33          | 0.389                 |                             |                                      |        |         |                    |                        |                        |                         |                      |         |                         |
| 8c               | R552H      |                      | -0.381  | 22 | 0.707   |               |           |             |                       |                             |                                      |        |         |                    |                        |                        |                         |                      |         |                         |
| 8c               | S321X      |                      | -3.974  | 22 | < 0.001 |               |           |             |                       |                             |                                      |        |         |                    |                        |                        |                         |                      |         |                         |
| 9a               | R552H      |                      |         |    |         |               |           |             |                       |                             |                                      |        |         | 39.0               |                        | 0.061                  |                         |                      |         |                         |
| 9a               | S321X      |                      |         |    |         |               |           |             |                       |                             |                                      |        |         | 28.0               |                        | 0.012                  |                         |                      |         |                         |
| 9b               | R552H      |                      |         |    |         |               |           |             |                       |                             |                                      | 5.853  | 2       | 0.054              |                        |                        |                         |                      |         |                         |
| 9b               | S321X      |                      |         |    |         |               |           |             |                       |                             |                                      | 10.714 | 2       | 0.005              | 20.0<br>18.5           | wt vs het<br>wt vs hom | 0.009<br>0.007          |                      |         |                         |
| 10a              | R552H      | DCs                  |         |    |         | 19.005        | 35        | 33          | < 0.001               | < 0.001<br>< 0.001<br>0.943 | wt vs hom<br>het vs hom<br>wt vs het |        |         |                    |                        |                        |                         |                      |         |                         |
| 10a              | R552H      | USDs                 |         |    |         | 57.369        | 31        | 29          | < 0.001               | < 0.001<br>< 0.001<br>0.989 | wt vs hom<br>het vs hom<br>wt vs het |        |         |                    |                        |                        |                         |                      |         |                         |
| 10b              | S321X      | DCs                  |         |    |         | 27.674        | 35        | 33          | < 0.001               | < 0.001<br>< 0.001<br>0.174 | wt vs hom<br>het vs hom<br>wt vs het |        |         |                    |                        |                        |                         |                      |         |                         |
| 10b              | S321X      | USDs                 |         |    |         | 58.171        | 34        | 32          | < 0.001               | < 0.001<br>< 0.001<br>0.545 | wt vs hom<br>het vs hom<br>wt vs het |        |         |                    |                        |                        |                         |                      |         |                         |
| 11a              | R552H      | DC types of wt       |         |    |         | 11.570        | 30        | 28          | < 0.001               | < 0.001<br>0.006            | hn vs ln<br>mn vs ln                 |        |         |                    |                        |                        |                         |                      |         |                         |
| 11a              | R552H      | DC types of het      |         |    |         | 6.396         | 27        | 25          | 0.006                 | 0.004                       | hn vs ln                             |        |         |                    |                        |                        |                         |                      |         |                         |
| 11a              | R552H      | high-noise DCs       |         |    |         | 16.350        | 34        | 32          | < 0.001               | < 0.001<br>< 0.001          | wt vs hom<br>het vs hom              |        |         |                    |                        |                        |                         |                      |         |                         |
| 11b              | S321X      | DC types of wt       |         |    |         | 9.689         | 28        | 26          | < 0.001               | < 0.001<br>0.004            | hn vs ln<br>mn vs ln                 |        |         |                    |                        |                        |                         |                      |         |                         |
| 11b              | S321X      | high-noise DCs       |         |    |         | 48.235        | 34        | 32          | < 0.001               | < 0.001<br>< 0.001<br>0.026 | wt vs hom<br>het vs hom<br>wt vs het |        |         |                    |                        |                        |                         |                      |         |                         |
| 11b              | S321X      | medium-noise DCs     |         |    |         | 17.536        | 33        | 31          | < 0.001               | < 0.001<br>0.001            | wt vs hom<br>het vs hom              |        |         |                    |                        |                        |                         |                      |         |                         |
| 11b              | S321X      | low-noise DCs        |         |    |         | 17.044        | 24        | 22          | < 0.001               | 0.003<br>< 0.001            | wt vs hom<br>het vs hom              |        |         |                    |                        |                        |                         |                      |         |                         |
| 12a              | R552H      |                      |         |    |         |               |           |             |                       |                             |                                      |        |         |                    |                        |                        |                         |                      | 0.655   | < 0.0001                |
| 12b              | S321X      |                      |         |    |         |               |           |             |                       |                             |                                      |        |         |                    |                        |                        |                         |                      | 0.555   | < 0.0001                |

| Number of figure | mouse line | object of comparison                                       | t-test  |    |         | one-way ANOVA |           |             | Tukey-test p-value | one-way ANOVA on ranks |                           |         | U-test  |                         | Chi <sup>2</sup> -test |                         |    | Spearman Correlation |                         |         |
|------------------|------------|------------------------------------------------------------|---------|----|---------|---------------|-----------|-------------|--------------------|------------------------|---------------------------|---------|---------|-------------------------|------------------------|-------------------------|----|----------------------|-------------------------|---------|
|                  |            |                                                            | t-value | df | p-value | F-value       | df effect | df residual |                    | p-value                | value of Kruskal-Wallis H | df      | p-value | value of Mann-Whitney U | p-value                | Chi <sup>2</sup> -value | df | p-value              | correlation coefficient | p-value |
| S1a              | R552H      |                                                            |         |    |         |               |           |             |                    | 25.466                 | 2                         | < 0.001 | 0.0     | wt vs hom               | < 0.001                |                         |    |                      |                         |         |
| S1a              | R552H      |                                                            |         |    |         |               |           |             |                    |                        |                           |         | 0.0     | het vs hom              | < 0.001                | 24.0                    | 1  | < 0.001              | hom vs wt               |         |
| S1a & 1          | both       | USIs of hom                                                |         |    |         |               |           |             |                    |                        |                           |         |         |                         |                        | 4.8                     | 1  | 0.030                | hom vs het              |         |
| S1b              | R552H      | DCs                                                        |         |    |         |               |           |             |                    | 1.975                  | 2                         | 0.372   |         |                         |                        |                         |    |                      |                         |         |
| S1b              | R552H      | USDs                                                       |         |    |         |               |           |             |                    | 19.129                 | 2                         | < 0.001 | 5.0     | wt vs hom               | < 0.001                |                         |    |                      |                         |         |
| S1b              | R552H      | DCs & USDs of wt<br>DCs & USDs of het<br>DCs & USDs of hom |         |    |         |               |           |             |                    |                        |                           |         | 4.5     | het vs hom              | < 0.001                |                         |    |                      |                         |         |
|                  |            |                                                            |         |    |         |               |           |             |                    |                        |                           |         | 18.5    |                         | 0.002                  |                         |    |                      |                         |         |
|                  |            |                                                            |         |    |         |               |           |             |                    |                        |                           |         | 37.5    |                         | 0.050                  |                         |    |                      |                         |         |
|                  |            |                                                            |         |    |         |               |           |             |                    |                        |                           |         | 0.0     |                         | < 0.001                |                         |    |                      |                         |         |
| S2               | R552H      |                                                            | 0.053   | 22 | 0.959   |               |           |             |                    |                        |                           |         |         |                         |                        |                         |    |                      |                         |         |
| S2               | S321X      |                                                            | -2.069  | 20 | 0.052   |               |           |             |                    |                        |                           |         |         |                         |                        |                         |    |                      |                         |         |
| S3               | R552H      | clicks                                                     |         |    |         | 9.085         | 35        | 33          | < 0.001            | 0.001                  | wt vs hom                 |         |         |                         |                        |                         |    |                      |                         |         |
| S3               | R552H      | USDs                                                       |         |    |         | 27.032        | 34        | 32          | < 0.001            | 0.004                  | het vs hom                |         |         |                         |                        |                         |    |                      |                         |         |
| S3               | R552H      | sum of clicks & USDs                                       |         |    |         | 1.844         | 35        | 33          | 0.174              | < 0.001                | wt vs hom                 |         |         |                         |                        |                         |    |                      |                         |         |
| S3               | R552H      | clicks & USDs of wt                                        | -3.986  | 22 | < 0.001 |               |           |             |                    |                        |                           |         |         |                         |                        |                         |    |                      |                         |         |
| S3               | R552H      | clicks & USDs of het                                       | -2.374  | 22 | 0.027   |               |           |             |                    |                        |                           |         |         |                         |                        |                         |    |                      |                         |         |
| S3               | R552H      | clicks & USDs of hom                                       | 4.020   | 21 | < 0.001 |               |           |             |                    |                        |                           |         |         |                         |                        |                         |    |                      |                         |         |
| S4a              | R552H      | USDs & USIs of wt                                          |         |    |         |               |           |             |                    |                        |                           |         | 0.0     |                         | < 0.001                |                         |    |                      |                         |         |
| S4a              | S321X      | USDs & USIs of wt                                          |         |    |         |               |           |             |                    |                        |                           |         | 0.0     |                         | < 0.001                |                         |    |                      |                         |         |
| S4b              | R552H      | USDs & USIs of het                                         | 26.337  | 22 | < 0.001 |               |           |             |                    |                        |                           |         |         |                         |                        |                         |    |                      |                         |         |
| S4b              | S321X      | USDs & USIs of het                                         | 19.447  | 21 | < 0.001 |               |           |             |                    |                        |                           |         |         |                         |                        |                         |    |                      |                         |         |

Abbreviations: df: degrees of freedom wt: wild-types het: heterozygotes hom: homozygotes vs: versus hn: high-noise DCs mn: medium-noise DCs ln: low-noise DCs
